# Supplementary material for: Doping effect of antimony on BaFeO3 perovskite oxide: optical, electronic, magnetic and thermoelectric properties
Source: Royal Society of Chemistry journal article supplement (doi:10.1039/d5ra06101f), 2025-01-01
Supplement: d5ra06101f1.pdf [file d5ra06101f1.pdf]

## Supplementary Information

### **Doping Effect of Antimony on $BaFeO_3$ Perovskite Oxide: Optical, Electronic, Magnetic and Thermoelectric Properties**

Md. Riad Khan<sup>1</sup>, Sanzida Naznin Mim<sup>1</sup>, Zihad Hossain<sup>1</sup>, Emon Hasan Konok<sup>1</sup>, Dr. Md. Saiful Alam<sup>2</sup>  
Dr. Mohammad Abdur Rashid<sup>3</sup>, Md. Lokman Ali<sup>1\*</sup>

<sup>1</sup>Department of Physics, Pabna University of Science and Technology, Pabna-6600, Bangladesh

<sup>2</sup>Department of Physics, University of Chittagong, Hathazari-4331, Bangladesh

<sup>3</sup>Department of Physics, Jashore University of Science and Technology, Jashore-7408, Bangladesh

Corresponding Author's e-mail: lokman.cu12@gmail.com

#### Supplementary Methods:

#### **1.1. Volume Optimization: Calculation Methods**

The equation presented is a form of the Birch-Murnaghan equation of state[1], which is commonly used to fit the energy vs volume (E vs V) data obtained from first-principles calculations. It provides valuable insights into the mechanical properties of materials under hydrostatic pressure. Hence the fitting Birch-Murnaghan equation given by,

$$E(V) = E_0 + \frac{B_0 V}{[B'_0(B'_0 - 1)]} \left[ \left( \frac{V_0}{V} \right)^{(B'_0 - 1)} + (B'_0 - 1) \right] - \frac{B_0 V_0}{B'_0 - 1} \quad (1)$$

Where  $E(V)$  denotes the total energy at a given volume  $V$ ,  $E_0$  represents the minimum energy corresponding to the equilibrium volume  $V_0$ , The parameter  $B_0$  is the bulk modulus at equilibrium, reflecting the material's resistance to volume change under applied pressure. The term  $B'_0$  is the first derivative of the bulk modulus with respect to pressure, indicating how the compressibility of the material evolves under increasing pressure. The ratio  $\left( \frac{V_0}{V} \right)^{(B'_0 - 1)}$  describes the non-linear change in energy with respect to compression or expansion.

Volume optimization of Pure  $BaFeO_3$

| Volume (Bohr <sup>3</sup> ) | ΔVol (%) | Total Energy (Ry) |
|-----------------------------|----------|-------------------|
| 401.43966                   | -5.00    | -19276.15450501   |
| 405.66542                   | -4.00    | -19276.15630557   |
| 409.89109                   | -3.00    | -19276.15743921   |
| 414.11668                   | -2.00    | -19276.15810981   |

|           |       |                 |
|-----------|-------|-----------------|
| 418.34234 | -1.00 | -19276.15832588 |
| 422.56810 | 0.00  | -19276.15806284 |
| 426.79382 | 1.00  | -19276.15756652 |
| 431.01954 | 2.00  | -19276.15668103 |
| 435.24516 | 3.00  | -19276.15535176 |
| 439.47090 | 4.00  | -19276.15355434 |
| 443.69651 | 5.00  | -19276.15164043 |

Where,

Volume = 418.34234 Bohr<sup>3</sup>

Minimum energy = -19276.15832588 Ry

Change in volume = -1.00 %

### Volume optimization of 12.5% Sb- doped BaFeO<sub>3</sub>

| Volume (Bohr <sup>3</sup> ) | ΔVol (%) | Total Energy (Ry) |
|-----------------------------|----------|-------------------|
| 3211.517                    | -5       | -164630.75647872  |
| 3245.323                    | -4       | -164630.78031558  |
| 3279.129                    | -3       | -164630.80098508  |
| 3312.934                    | -2       | -164630.81692826  |
| 3346.739                    | -1       | -164630.82906511  |
| 3380.545                    | 0        | -164630.83640005  |
| 3414.351                    | 1        | -164630.84234781  |
| 3448.156                    | 2        | -164630.84481484  |
| 3481.961                    | 3        | -164630.84404520  |
| 3515.767                    | 4        | -164630.83995004  |
| 3549.572                    | 5        | -164630.83316549  |
| 3583.377                    | 6        | -164630.82332920  |
| 3617.183                    | 7        | -164630.81188272  |

Where,

Volume = 3448.15567 Bohr<sup>3</sup>

Minimum energy = -164630.84481484 Ry

Change in volume = 2.00 %

### Volume optimization of 25% Sb- doped BaFeO<sub>3</sub>

| Volume (Bohr <sup>3</sup> ) | ΔVol (%) | Total Energy (Ry) |
|-----------------------------|----------|-------------------|
| 3199.9557                   | -5       | -175052.26743460  |
| 3233.63938                  | -4       | -175052.30382875  |
| 3267.32345                  | -3       | -175052.33733845  |
| 3301.00717                  | -2       | -175052.36504879  |
| 3334.69058                  | -1       | -175052.38896332  |
| 3368.37449                  | 0        | -175052.40737160  |
| 3402.05849                  | 1        | -175052.42318450  |
| 3435.74226                  | 2        | -175052.43459231  |
| 3469.42555                  | 3        | -175052.44232088  |
| 3503.1096                   | 4        | -175052.44757688  |
| 3536.793                    | 5        | -175052.44960388  |

|            |    |                  |
|------------|----|------------------|
| 3570.47717 | 6  | -175052.44816678 |
| 3604.16085 | 7  | -175052.44449742 |
| 3637.84424 | 8  | -175052.43789815 |
| 3671.52836 | 9  | -175052.42944722 |
| 3705.21217 | 10 | -175052.41856316 |

Where,

Volume = 3536.79300 Bohr<sup>3</sup>

Minimum energy = -175052.44960388 Ry

Change in volume = 5.00 %

## 1.2.Optical Constants: Calculation Methods

The dielectric function's real and imaginary parts can be used to determine the optical behavior of a material. For crystalline solids, the complex dielectric function, dependent on frequency, is expressed as:

$$\varepsilon(\omega) = \varepsilon_1(\omega) + i\varepsilon_2(\omega) \quad (2)$$

where  $\varepsilon_1(\omega)$  represents the material's dispersive properties (i.e. real part), and  $\varepsilon_2(\omega)$  accounts for absorption effects (i.e. imaginary part). In cartesian coordinates,

$$\varepsilon(\omega) = \begin{pmatrix} \varepsilon_{xx}(\omega) & \varepsilon_{xy}(\omega) & \varepsilon_{xz}(\omega) \\ \varepsilon_{yx}(\omega) & \varepsilon_{yy}(\omega) & \varepsilon_{yz}(\omega) \\ \varepsilon_{zx}(\omega) & \varepsilon_{zy}(\omega) & \varepsilon_{zz}(\omega) \end{pmatrix} \quad (3)$$

At long-wavelength infrared (LWIR) wavelengths, intra-band transitions play a crucial role. Therefore, the overall dielectric function can be represented by the combined effect of inter-band ( $\varepsilon^{inter}(\omega)$ ) and intra-band transitions ( $\varepsilon^{intra}(\omega)$ ), respectively. And this is represented by the following expression,

$$\varepsilon(\omega) = \varepsilon^{inter}(\omega) + \varepsilon^{intra}(\omega) \quad (4)$$

First-order time-dependent perturbation theory allows for the derivation of the inter-band component of the dielectric function [4]. It is given by the following expression:

$$\varepsilon_{\alpha\beta}^{inter}(\omega) = 1 - \frac{8\pi e^2}{\Omega} \sum_{k,v,c} \frac{\langle \psi_{k+q}^c | e^{iq \cdot r} | \psi_k^v \rangle \langle \psi_k^v | e^{-iq \cdot r} | \psi_{k+q}^c \rangle}{(E_{k+q}^c - E_k^v - \hbar\omega - i\hbar\alpha)} + CC \quad (5)$$

In this formulation,  $\omega$  symbolizes the phonon frequency, while  $\Omega$  represents the volume of a single unit cell. The elementary charge of an electron is represented by  $e$  and  $r$  defines the position vector. The parameter  $q$  captures the photon momentum. Furthermore,  $E_k^v$  and  $E_{k+q}^c$  correspond to the wavefunctions of electrons in the valence and conduction bands at a specific wavevector  $k$ . In computational approaches, the dielectric function's imaginary part is typically

evaluated through numerical methods, and the real component is subsequently determined using the Kramers-Kronig relation, as shown below,

$$\varepsilon_1^{inter}(\omega) = 1 + \frac{2}{\pi} P \int_0^{\infty} \frac{\omega' \varepsilon_2^{inter}(\omega') d\omega'}{\omega'^2 - \omega^2}. \quad (6)$$

In addition, the intra-band contributions to the dielectric function are analyzed with the help of the free-electron plasma model, which is represented by,

$$\varepsilon^{inter}(\omega) = 1 - \frac{\omega_p^2}{\omega(\omega + i\gamma)}, \quad (7)$$

Here, the plasma frequency ( $\omega_p$ ) is determined using Density Functional Theory (DFT) calculations. Herein, The inverse lifetime ( $\gamma$ ) may vary from 0 to 1 eV [5] and the complex optical conductivity ( $\omega$ ) is established based on the following relation:

$$\sigma(\omega) = -i \frac{\omega}{4\pi} [\varepsilon(\omega) - 1] \quad (8)$$

However, the extinction coefficient  $K(\omega)$ , The absorbance coefficient  $I(\omega)$ , the energy loss function  $L(\omega)$ , refractive index  $n(\omega)$ , the reflectivity coefficient  $r(\omega)$ , and the dielectric function  $\varepsilon(\omega)$ , including its real  $\varepsilon_1(\omega)$ , and imaginary  $\varepsilon_2(\omega)$  parts can be determined with the help of the following equations [6]:

$$K(\omega) = \frac{I(\omega)}{2\omega} \quad (9)$$

$$I(\omega) = \sqrt{2}\omega \left( \sqrt{\varepsilon_1(\omega)^2 + \varepsilon_2(\omega)^2} - \varepsilon_1(\omega) \right)^{1/2} \quad (10)$$

$$L(\omega) = \frac{E}{(\varepsilon_1(\omega)^2 + \varepsilon_2(\omega)^2)} \quad (11)$$

$$r(\omega) = \frac{n + iK - 1}{n + iK + 1} \quad (12)$$

$$n(\omega) = \left( \frac{1}{\sqrt{2}} \right) \left( \sqrt{\varepsilon_1(\omega)^2 + \varepsilon_2(\omega)^2} - \varepsilon_1(\omega) \right)^{1/2} \quad (13)$$

$$\varepsilon_1(\omega) = n^2 - K^2 \quad (14)$$

$$\varepsilon_2(\omega) = 2nK \quad (15)$$

$$\sqrt{\varepsilon(\omega)} = n(\omega) + iK(\omega) \quad (16)$$

### 1.3. Magnetic moments: Calculation Methods

The total magnetic moment given by the following equation[7],

$$M_{tol} = \sum_i M_i^{\uparrow} - M_i^{\downarrow} + M_{interstitial} \quad (17)$$

Where,

$M_i^{\uparrow}$  and  $M_i^{\downarrow}$  are the spin-up and spin-down electron populations inside the muffin- tin sphere of atom i.

$M_{interstitial}$  is the spin density contribution from the interstitial region.

#### 1.4. Thermoelectric properties: Calculation Methods

The performance of thermoelectric materials is commonly evaluated using the dimensionless figure of merit [7],

$$ZT = \frac{S^2 \sigma T}{\kappa} = \frac{S^2 \sigma T}{\kappa_e + \kappa_L} \quad (18)$$

where T is the absolute temperature,  $\sigma$  is the electrical conductivity, S is the Seebeck coefficient, and  $S^2 \sigma$  is the power factor (PF). Also,  $\kappa_e$  represents the thermal conductivity contributed by electrons and holes, while  $\kappa_L$  denotes the thermal conductivity arising from phonons propagating through the crystal lattice [8].

#### References:

- [1] “A Simple Derivation of the Birch–Murnaghan Equations of State (EOSs) and Comparison with EOSs Derived from Other Definitions of Finite Strain.” Accessed: Aug. 08, 2025. [Online]. Available: <https://www.mdpi.com/2075-163X/9/12/745>
- [2] S. C. Tidrow, “Mapping Comparison of Goldschmidt’s Tolerance Factor with Perovskite Structural Conditions,” *Ferroelectrics*, vol. 470, no. 1, pp. 13–27, Oct. 2014, doi: 10.1080/00150193.2014.922372.
- [3] A. Kumar, A. S. Verma, and S. R. Bhardwaj, “Prediction of Formability in Perovskite-Type Oxides~!2008-08-05~!2008-10-08~!2008-12-05~!,” *Open Appl. Phys. J.*, vol. 1, no. 1, pp. 11–19, Dec. 2008, doi: 10.2174/1874183500801010011.
- [4] S. Bharadwaj, T. Van Mechelen, and Z. Jacob, “Picophotonics: Anomalous Atomistic Waves in Silicon,” *Phys. Rev. Appl.*, vol. 18, no. 4, p. 044065, Oct. 2022, doi: 10.1103/PhysRevApplied.18.044065.
- [5] M. J. Van Setten, S. Er, G. Brocks, R. A. De Groot, and G. A. De Wijs, “First-principles study of the optical properties of Mg x Ti 1 – x H 2,” *Phys. Rev. B*, vol. 79, no. 12, p. 125117, Mar. 2009, doi: 10.1103/PhysRevB.79.125117.

- [6] Md. L. Ali, Z. Hossain, S. N. Mim, and S. K. Saha, "Pressure Effects on Physical Properties of Binary Rare Earth Mono-Pnictide YBi for Optoelectronics Applications," *Adv. Theory Simul.*, vol. n/a, no. n/a, p. 2401066, doi: 10.1002/adts.202401066.
- [7] K. Schwarz and P. Blaha, "Solid state calculations using WIEN2k," *Comput. Mater. Sci.*, vol. 28, no. 2, pp. 259–273, Oct. 2003, doi: 10.1016/S0927-0256(03)00112-5.
- [8] R. P. Chasmar and R. Stratton, "The Thermoelectric Figure of Merit and its Relation to Thermoelectric Generators†," *J. Electron. Control*, vol. 7, no. 1, pp. 52–72, Jul. 1959, doi: 10.1080/00207215908937186.
